# Supplementary material for: Piezotronic-enhanced oxygen evolution reaction enabled by a Au/MoS2 nanosheet catalyst
Source: Royal Society of Chemistry journal article supplement (doi:10.1039/c9cy02611h), 2020-01-01
Supplement: c9cy02611h1.pdf [file c9cy02611h1.pdf]

## Supplementary Information

# Piezotronic-Enhanced Oxygen Evolution Reaction Enabled by a Au/MoS<sub>2</sub> Nanosheet Catalyst

Juanjuan Bian,<sup>1,2</sup> and Chunwen Sun<sup>1,2\*</sup>

<sup>1</sup>CAS Center for Excellence in Nanoscience, Beijing Institute of Nanoenergy and Nanosystems,  
Chinese Academy of Sciences, Beijing 100083, P. R. China

<sup>2</sup>College of Nanoscience and Technology, University of Chinese Academy of Sciences, Beijing 10  
0049, P. R. China

\* Corresponding authors.

Tel.: +86-10-82854648, fax: +86-10-82854648. Emails: [sunchunwen@binn.cas.cn](mailto:sunchunwen@binn.cas.cn) (C.W. Sun)

**Table S1.** ICP data of the contents of different elements.

| Elements | The tested mass content (wt. %) |
|----------|---------------------------------|
| Au       | 0.2668                          |
| Mo       | 46.0310                         |
| S        | 26.1795                         |

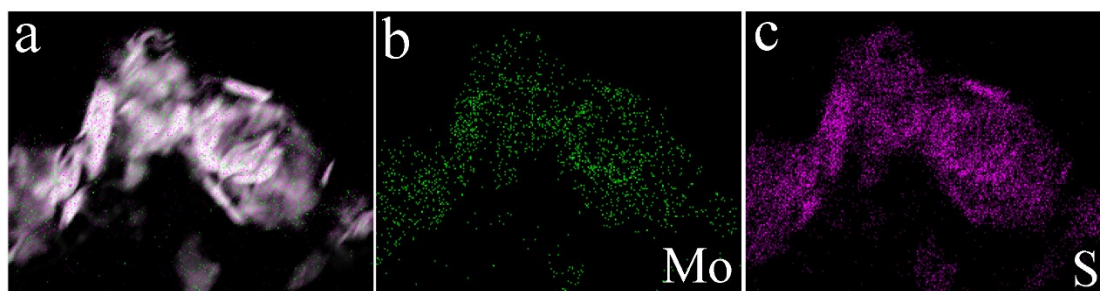

**Fig. S1** (a) ADF STEM image of MoS<sub>2</sub> nanosheets. (b,c) The corresponding elemental mappings of Mo and S of the MoS<sub>2</sub> nanosheets.

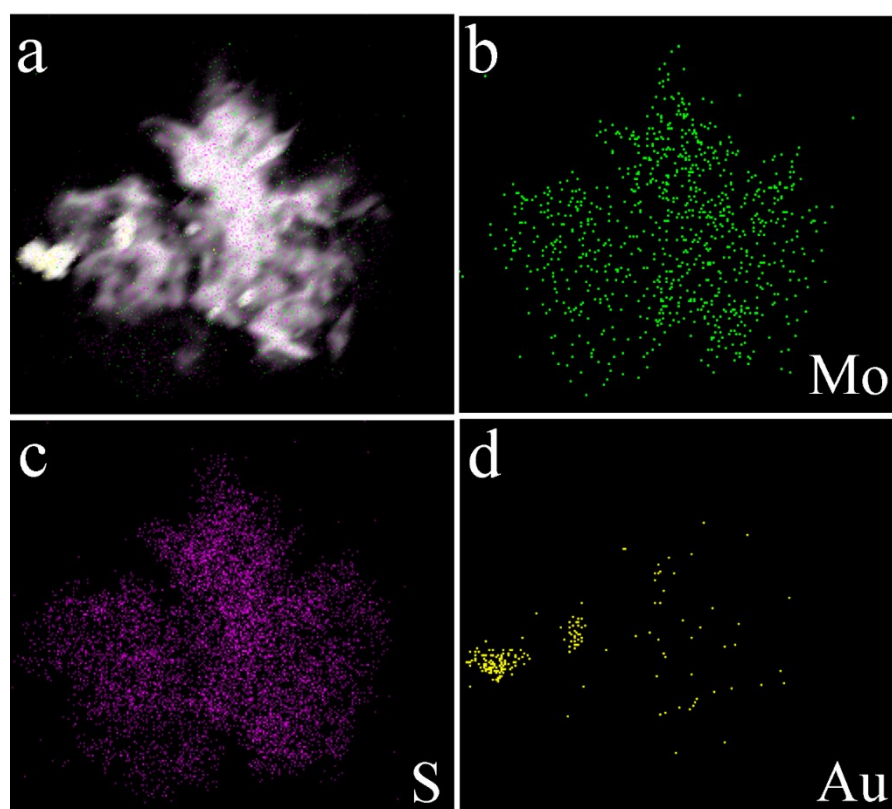

**Fig. S2** (a) ADF STEM image of Au-MoS<sub>2</sub> nanosheets. (b-d) The corresponding elemental mappings of Mo, S and Au of the Au-MoS<sub>2</sub> nanosheets.

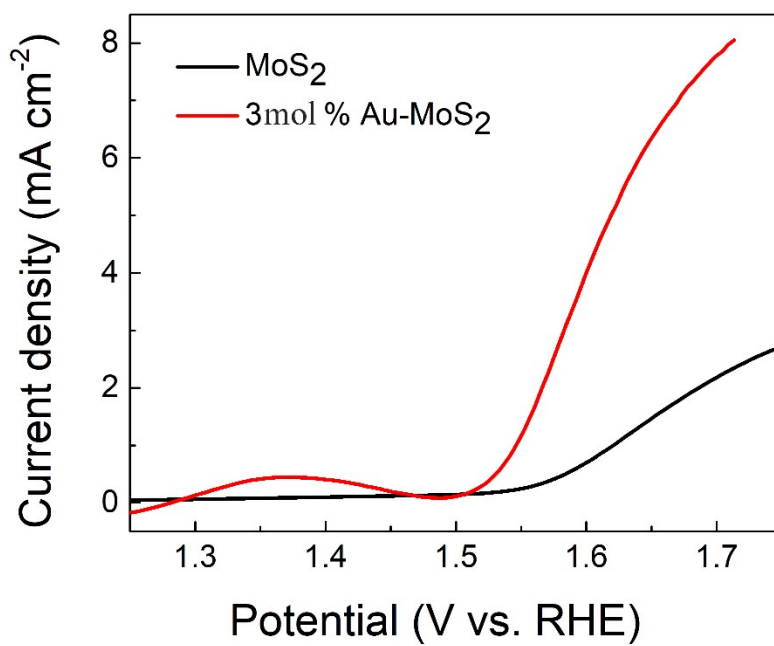

**Fig. S3** Comparison of OER performances of the pure MoS<sub>2</sub> and 3mol % Au-MoS<sub>2</sub> catalysts.

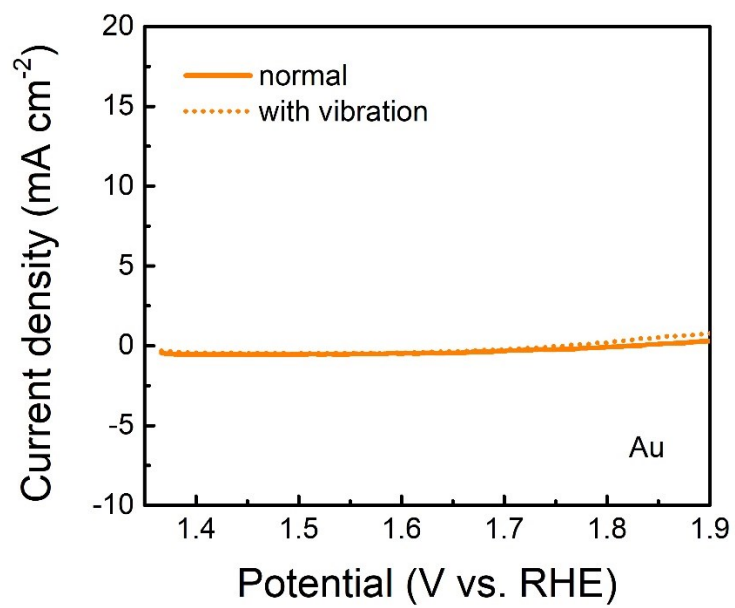

**Fig. S4** LSV curves of the Au nanoparticles tested under normal condition and with ultrasonic condition.

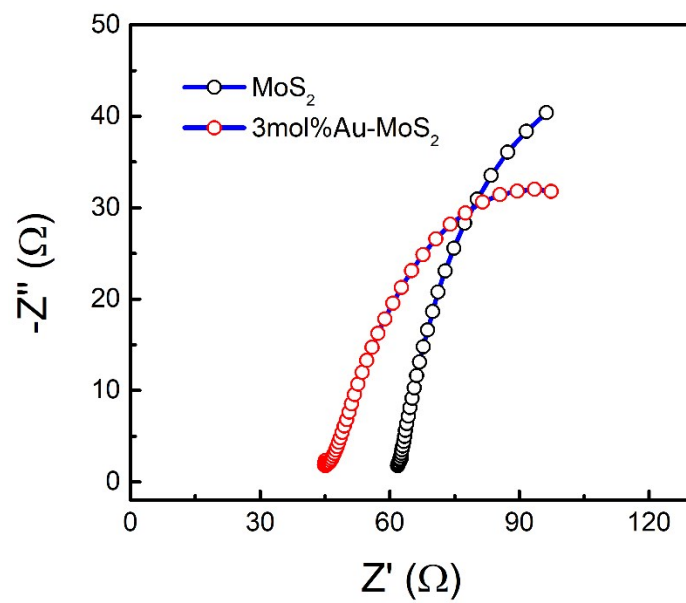

**Fig. S5** The electrochemical impedance spectra of the pure  $\text{MoS}_2$  and 3mol % Au- $\text{MoS}_2$  catalysts.

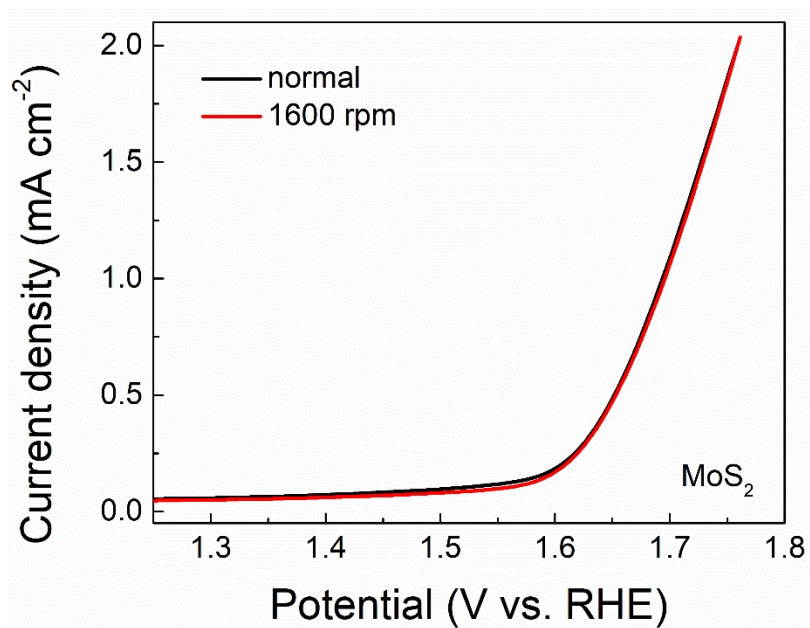

**Fig. S6** Comparison of OER performance of the MoS<sub>2</sub> under normal condition and rotating condition at 1600 rpm.

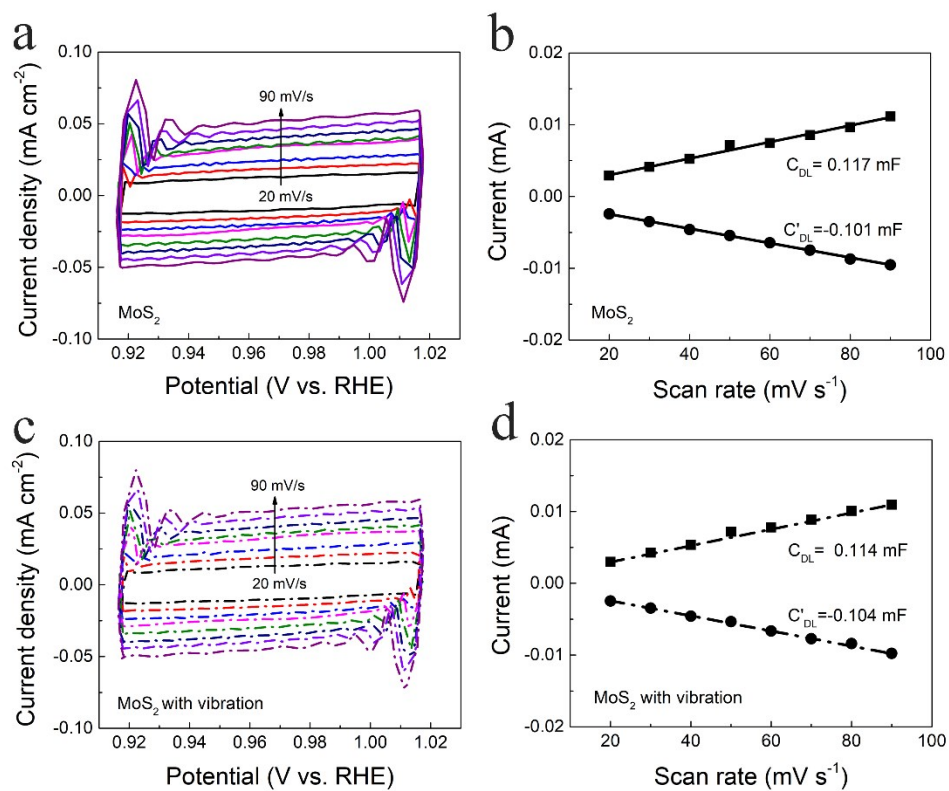

**Fig. S7** The cyclic voltammetry (CV) curves in the non-faradaic region for MoS<sub>2</sub> catalyst (a) under normal condition and (c) with ultrasonic condition. Current-scan rates of MoS<sub>2</sub> catalyst (b) under normal condition and (d) with ultrasonic condition.



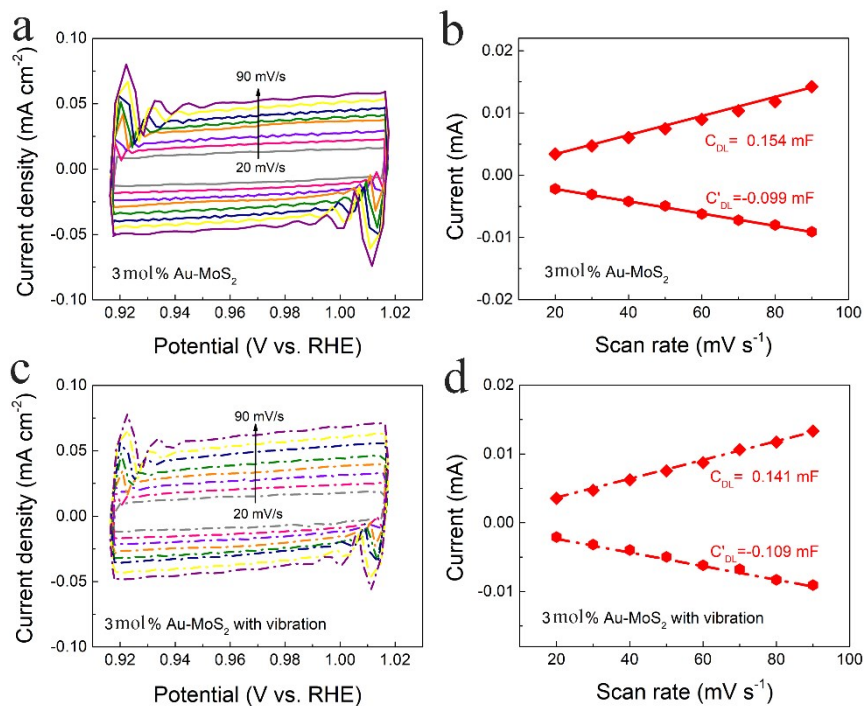

**Fig. S8** The CV curves in the non-faradaic region at various scan rates for 3mol % Au-MoS<sub>2</sub> catalyst (a) under normal condition and (c) with ultrasonic condition. Current-scan rates of 3mol % Au-MoS<sub>2</sub> catalyst (b) under normal condition and (d) with ultrasonic condition.

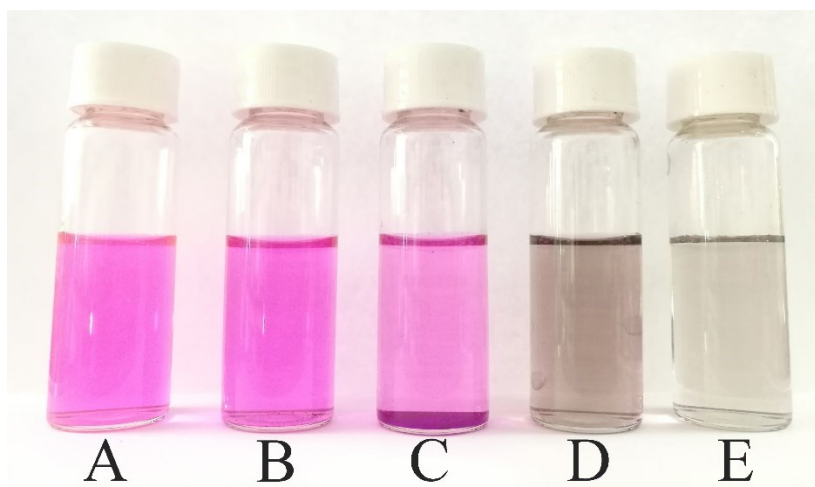

**Fig. S9** The photo of the piezo-enhanced catalytic decomposition of RhB dye solution under different conditions. A case shows pure RhB dye reaction without catalyst. B and D cases represent RhB dye reactions for MoS<sub>2</sub> catalyst without and with vibration, respectively. C and E cases are the RhB dye reactions for 3mol % Au-MoS<sub>2</sub> catalyst without vibration and under ultrasonic vibration, respectively.

**Table S2.** Comparison of the electrochemical performance and dye degradation performance with different catalysts.

| Catalyst                                        | OER performance (onset potential) | Dye degradation performance          | Refs.     |
|-------------------------------------------------|-----------------------------------|--------------------------------------|-----------|
| Au-MoS <sub>2</sub>                             | 1.52 V                            | almost 100% after 30 minutes         | This work |
| BaTiO <sub>3-x</sub>                            | 1.6 V                             | -                                    | S1        |
| MoS <sub>2</sub> nanosheets                     | -                                 | 86.9% under 20 min light irradiation | S2        |
| Bi <sub>4</sub> Ti <sub>3</sub> O <sub>12</sub> | -                                 | 62.1% after 4 h illumination         | S3        |
| NCNF-900                                        | 1.7 V                             | -                                    | S4        |
| Ag <sub>2</sub> O-BaTiO <sub>3</sub>            | -                                 | totally degraded within 1.5 h        | S5        |
| Co <sub>3</sub> O <sub>4</sub>                  | 1.62 V                            | -                                    | S6        |

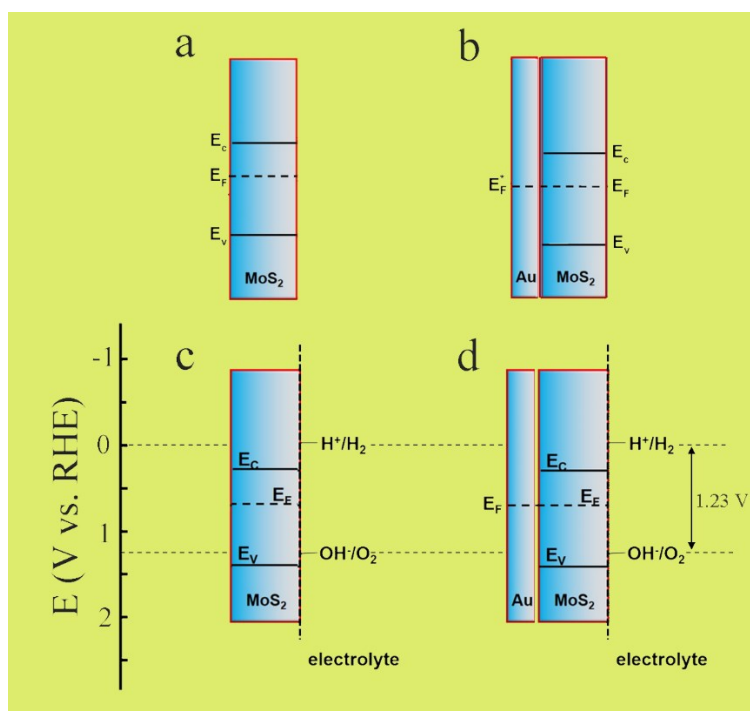

**Fig. S10** The energy band potential diagrams. (a) The energy bands of bulk  $\text{MoS}_2$  catalyst. (b) The energy bands of  $\text{Au-MoS}_2$  catalyst under equilibrium. (c) The band potential with bulk  $\text{MoS}_2$  piezo-catalyst immersing in electrolyte. (d) The band potential with  $\text{Au-MoS}_2$  piezo-catalyst immersing in electrolyte.

## References

- S1. C-F. Chen, G. King, R.M. Dickerson, P. A. Papin, S. Gupta, W. Kellogg and G. Wu, *Nano Energy*, 2015, **13**, 423–432.
- S2. W. J. Zhou, Z. Y. Yin, Y. P. Du, X. Huang, Z. Y. Zeng, Z. X. Fan, H. Liu, J. Y. Wang and H. Zhang, *Small*, 2013, **9**, 140–147.
- S3. S. C. Tu, H. W. Huang, T. R. Zhang and Y. H. Zhang, *Appl. Catal. B: Environ.*, 2017, **219**, 550–562.
- S4. Q. Liu, Y. B. Wang, L. M. Dai and J. N. Yao, *Adv. Mater.*, 2016, **28**, 3000–3006.
- S5. H. Li, Y. Sang, S. Chang, X. Huang, Y. Zhang, R. Yang, H. Jiang, H. Liu and Z. L. Wang, *Nano Lett.*, 2015, **15**, 2372–2379.
- S6. D. D. Wang, X. Chen, D. G. Evans and W. S. Yang, *Nanoscale*, 2013, **5**, 5312–5315.
